# Supplementary material for: Toxoplasma gondii Infection in Alpine Red Deer (Cervus elaphus): Its Spread and Effects on Fertility
Source: PubMed Central journal article supplement (PMC4583299; doi:10.1371/journal.pone.0138472), 2015-09-25
Supplement: pone.0138472.s005.pdf [file pone.0138472.s005.pdf]

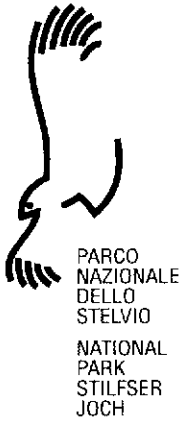

Dr Nicoletta Formenti  
Department of Veterinary Sciences and Public Health  
Università degli Studi di Milano  
Via Celoria 10  
20133 Milano - Italy

Prot. n. 1962 del 16/07/2015

REFERENCE: PLOS ONE - Submission PONE-D-15-18187R1 - [EMID:d68af399800e7704].

Dear Dr Formenti,

The Stelvio National Park, the original copyright holder of all the data in Figure 1 of the submitted paper PONE-D-15-18187R1 - [EMID:d68af399800e7704], allows the permission for the open-access journal PLOS ONE to publish Figure 1 under the Creative Commons Attribution License (CCAL) CC BY 3.0.

Best regards

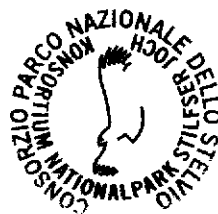

THE SCIENTIFIC COORDINATOR

Dr Luca Pedrotti
